# Supplementary material for: Paradoxical role of CBX8 in proliferation and metastasis of colorectal cancer
Source: PubMed Central journal article supplement (PMC4279409; doi:10.18632/oncotarget.2502), 2014-10-24
Supplement: oncotarget-05-10778-s001.pdf [file oncotarget-05-10778-s001.pdf]

## SUPPLEMENTARY METHODS TABLES AND FIGURES

### RNAi sequence

The pLKO1-CBX8 short hairpin RNA (shRNA) constructs were purchased from sigma addrich corporation. The following CBX8-specific

RNAi target sequences into pLKO1: CBX8 shRNA #1: 5-GCGTGAGCTTGGCATAGTGAT-3; CBX8 shRNA #2: 5-GCATGGAATACCTCGTGAAAT-3. Sequences of siRNA target p53 refer to the previous published studies. 5'-GACTCCAGTGGTAATCTAC-3' (Oncogene. 2011 May 12;30(19):2282-8); 5'-AAGACTCCAGTGGTAATCTAC-3' (Mol Biol Cell. 2007;18(7):2630-5); 5'-GAAGAAACCACTGGATGGA-3' (BMC Cancer. 2011 ATg 25;11:378). During the transfection, the three siRNA were mixed as a pool.

### Primers for qPCR

| Genes  | F (5'-3')             | R (5'-3')               | size  |
|--------|-----------------------|-------------------------|-------|
| CBX8   | CCTTCGAAACATGGGTTTGT  | CTGGGCTTGTTCATCCACTCT   | 201bp |
| Bax    | CCCGAGAGGTCTTTTTCCGAG | CCAGCCCATGATGGTTCTGAT   | 155bp |
| CDKN1A | TGTCCGTCAGAACCCATGC   | AAAGTCGAAGTTCCATCGCTC   | 139bp |
| p16    | GAAGGTCCCTCAGACATCCCC | CCCTGTAGGACCTTCGGTGAC   | 94bp  |
| TP53I3 | GGAGGACCGGAAAACCTCTAC | CCTCAAGTCCCAAATGTTGCT   | 166bp |
| p53    | CAGCACATGACGGAGGTTGT  | TCATCCAAATACTCCACACGC   | 125bp |
| SESN1  | TGCTTTGGGCCGTTTGGATAA | TGTAGTGACGATAATGTAGGGGT | 131bp |
| ITGB4  | CTCCACCGAGTCAGCCTTC   | CGGGTAGTCCTGTGTCCTGTA   | 133bp |
| GAPDH  | ACAGTCAGCCGCATCTTCTT  | GACAAGCTTCCCCTTCTCAG    | 259bp |

### Primers for PCR of CHIP assay

| ITGB4    | F (5'-3')               | R (5'-3')                | size   |
|----------|-------------------------|--------------------------|--------|
| ITGB4-1  | TAAGTGGGCCAGGACAGAAG    | TTTGCAGTTTTGTCCAGTG      | 194bp  |
| ITGB4-2  | CTTCTGTGCCTGGTCTCTCA    | GGCATCATTACACAGGCAGG     | 212bp  |
| ITGB4-3  | TTCAGGAAGCTCTACAGGCC    | TTCGGACAGCAACAACCATG     | 243bp  |
| ITGB4-4  | TGACTCACCAGCGCCTCCTT    | GCCCGTCCTGGACCTACCTCG    | 190 bp |
| ITGB4-5  | CTGGCACGGAGAGCGGGG      | GCCTCTTAGCCCCCGTCC       | 132bp  |
| ITGB4-6  | CATCGAGTGCCAATCCATGCCAG | CCTCCAACCCCTAACCTCACGTTG | 157bp  |
| ITGB4-7  | TACTCGGGAACAGGCAGG      | CGGGTGTTTCAGGTCAGAGAA    | 177bp  |
| ITGB4-8  | GGTGTGGAGAGGTCAAGGAA    | TGCCAAACAACACCAGACTG     | 176bp  |
| ITGB4-9  | CCCCTGCAATCACTCTGAGA    | GAATCTCGCCACACTGTTGG     | 195bp  |
| ITGB4-10 | TCTCTAATGGGTGCTGCTGG    | CCAGTTTGGTTGAAGCACTCA    | 182bp  |
| ITGB4-11 | AGAATCGCTTGAACCCAGGA    | TGCTTCCTTCACTCCAGTT      | 194bp  |
| ITGB4-12 | CTTAGGTGTGAAAAGGGGCC    | AGCCTCTGTCTTCTGGGTTC     | 235bp  |
| p16      | GGCATCAGCAAAGTCTGAGC    | CTGGGAGACAAGAGCGAAAC     | 260bp  |
| GAPDH    | GGTAGGGAGTTCGAGACCAG    | TCAACGCAGTTCAGTTAGGC     | 290bp  |

| <b>p53</b> | <b>F (5'-3')</b>      | <b>R (5'-3')</b>     | <b>size</b> |
|------------|-----------------------|----------------------|-------------|
| p53-1      | CGGCAGCCCTGTTATTGTTT  | AAATGCAGGCGGAGAATAGC | 185 bp      |
| p53-2      | TCCTCCCCAACTCCATTTC   | GGACGGTGGCTCTAGACTTT | 187 bp      |
| p53-3      | GGGAGAAAACGTTAGGGTGTG | TGAGGGCAGAATTGGTGGAA | 174 bp      |
| p53-4      | GCTGCTGGGAGTTGTAGTCT  | TGCCTATATCAGTGCTGGGT | 235 bp      |
| p53-5      | GAAGCACAGCGGAGATTAGC  | GGTGCTAAGGAACACAGTGC | 178 bp      |
| p53-6      | CACTGCCATCACCATTACG   | GGGACCCAGTTTCTCTCTCC | 242 bp      |
| p53-7      | GCCCCGTTGTTATCCTTACC  | GCGACCCAGGTTTATTGTCC | 154 bp      |
| p53-8      | GCAGCATTGATGAAGAGGCA  | GCCCTAGCCCTACACTTGAA | 213 bp      |
| p53-9      | AGCTACTTGTGAGGCTGAGG  | TCTGCCCCGAATTCTGAAGT | 243 bp      |
| p53-10     | GCTGCTCTTCTCTGTCCTCA  | GCCAAGATCATGTCACTGCA | 174 bp      |
| p16        | GGCATCAGCAAAGTCTGAGC  | CTGGGAGACAAGAGCGAAAC | 260 bp      |
| GAPDH      | GGTAGGGAGTTCGAGACCAG  | TCAACGCAGTTCAGTTAGGC | 290 bp      |

**Supplementary Table S1. Correlation between CBX8 expression and clinicopathologic characteristics of colorectal cancer patients**

| Characteristics                    | n   | CBX8 expression           |                    | Chi-square test p value |
|------------------------------------|-----|---------------------------|--------------------|-------------------------|
|                                    |     | Low or none No. cases (%) | High No. cases (%) |                         |
| <b>Gender</b>                      |     |                           |                    |                         |
| Male                               | 131 | 61                        | 70                 | 0.915                   |
| Female                             | 109 | 50                        | 59                 |                         |
| <b>Age</b>                         |     |                           |                    |                         |
| ≤50                                | 89  | 40                        | 49                 | 0.755                   |
| >50                                | 151 | 71                        | 80                 |                         |
| <b>Clinical Stage</b>              |     |                           |                    | <b>0.004*</b>           |
| I+II                               | 95  | 34                        | 61                 |                         |
| III                                | 90  | 42                        | 48                 |                         |
| IV                                 | 55  | 35                        | 20                 |                         |
| <b>T classification</b>            |     |                           |                    | <b>0.011*</b>           |
| T1+T2                              | 48  | 14                        | 48                 |                         |
| T3                                 | 66  | 38                        | 66                 |                         |
| T4                                 | 126 | 59                        | 126                |                         |
| <b>N classification</b>            |     |                           |                    | 0.104                   |
| N0                                 | 113 | 46                        | 67                 |                         |
| N+                                 | 127 | 65                        | 62                 |                         |
| <b>M classification</b>            |     |                           |                    |                         |
| M0                                 | 185 | 76                        | 109                | <b>0.003*</b>           |
| M1                                 | 55  | 35                        | 20                 |                         |
| <b>Pathologic Differentiation</b>  |     |                           |                    |                         |
| Well                               | 23  | 9                         | 14                 | 0.611                   |
| Moderately                         | 160 | 73                        | 87                 |                         |
| Poorly                             | 57  | 29                        | 28                 |                         |
| <b>Histological Types</b>          |     |                           |                    | 0.132                   |
| Non-mucinous adenocarcinoma        | 219 | 98                        | 121                |                         |
| Mucinous adenocarcinoma            | 21  | 13                        | 8                  |                         |
| <b>Location</b>                    |     |                           |                    | 0.443                   |
| colon                              | 121 | 53                        | 68                 |                         |
| rectal                             | 119 | 58                        | 61                 |                         |
| <b>Vital status (at follow-up)</b> |     |                           |                    | <b>0.001*</b>           |
| Alive                              | 144 | 54                        | 90                 |                         |
| Death                              | 96  | 57                        | 39                 |                         |

\*p&lt;0.05

**Supplementary Table S2. Univariate and multivariate analysis for overall survival (Cox proportional hazards regression model)**

| Variable                | Univariate analysis |                  | Multivariate analysis |             |                  |
|-------------------------|---------------------|------------------|-----------------------|-------------|------------------|
|                         | No.                 | <i>p</i> value   | HR                    | 95% CI      | <i>p</i> value   |
| <b>CBX8 expression</b>  |                     | <b>&lt;0.001</b> | 0.642                 | 0.420–0.980 | <b>0.041</b>     |
| low expression          | 111                 |                  |                       |             |                  |
| high expression         | 129                 |                  |                       |             |                  |
| <b>Age</b>              |                     | 0.461            | 0.937                 | 0.617–1.423 | 0.761            |
| ≤50                     | 89                  |                  |                       |             |                  |
| >50                     | 151                 |                  |                       |             |                  |
| <b>Gender</b>           |                     | 0.818            | 0.868                 | 0.576–1.308 | 0.499            |
| Male                    | 131                 |                  |                       |             |                  |
| Female                  | 109                 |                  |                       |             |                  |
| <b>T classification</b> |                     | <b>&lt;0.001</b> | 1.206                 | 0.871–1.671 | 0.259            |
| T1+T2                   | 48                  |                  |                       |             |                  |
| T3                      | 66                  |                  |                       |             |                  |
| T4                      | 126                 |                  |                       |             |                  |
| <b>N classification</b> |                     | <b>&lt;0.001</b> | 2.887                 | 1.781–4.681 | <b>&lt;0.001</b> |
| N0                      | 113                 |                  |                       |             |                  |
| N+ (N1 and N2)          | 127                 |                  |                       |             |                  |
| <b>M classification</b> |                     | <b>&lt;0.001</b> | 2.695                 | 1.741–4.173 | <b>&lt;0.001</b> |
| M0                      | 185                 |                  |                       |             |                  |
| M1                      | 55                  |                  |                       |             |                  |
| <b>Differentiation</b>  |                     | <b>0.001</b>     | 1.420                 | 0.976–2.067 | 0.067            |
| Well                    | 23                  |                  |                       |             |                  |
| Moderately              | 160                 |                  |                       |             |                  |
| Poorly                  | 57                  |                  |                       |             |                  |

HR: Hazard Ratio; CI, confidence interval; \**p*<0.05

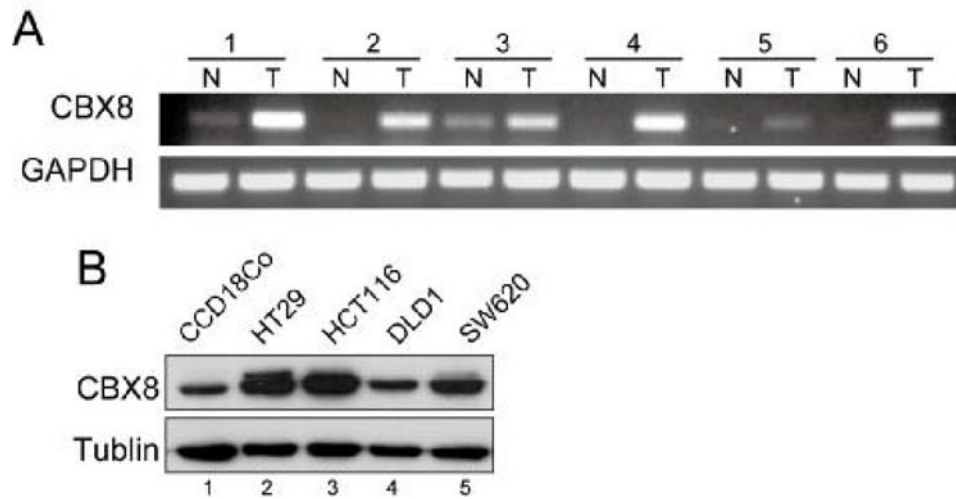

**Supplementary Figure S1: CBX8 was up-regulated in human colorectal cancer tissues and cell lines.** (A) CBX8 mRNA levels in six pairs of CRC tumor tissues (T) and their non-tumor counterparts (N) were assessed by RT-PCR. (B) The CBX8 protein levels were visualized in the indicated cell lines by Western Blot.

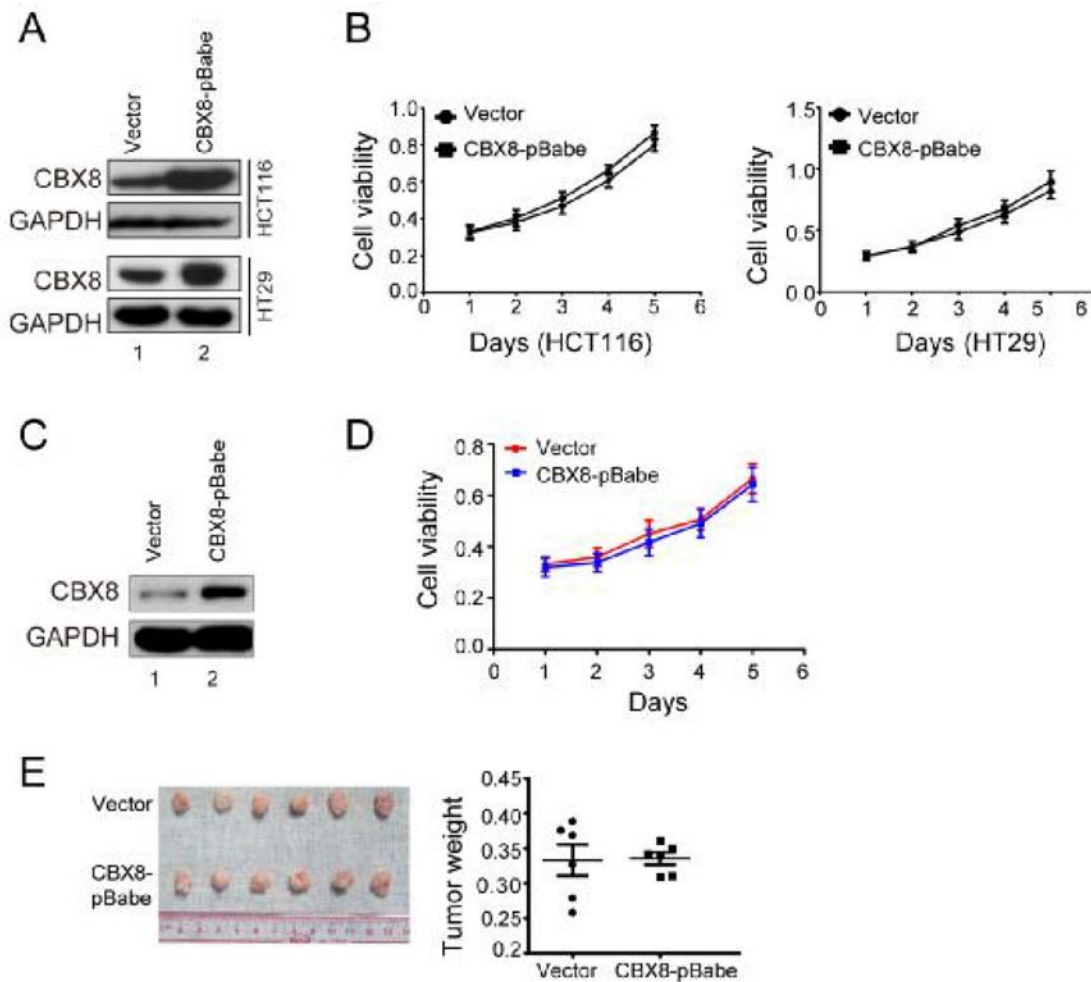

**Supplementary Figure S2: Ectopic CBX8 marginally affected CRC cell viability and tumor growth.** (A, B) HCT116 and HT29 cells stably overexpressing ectopic CBX8 (as indicated) were subjected to Western Blotting (A) and MTT assay (B) at different time points. The results are expressed as the mean  $\pm$  SD of three independent experiments. (C, D) DLD1 cells stably overexpressing ectopic CBX8 (as indicated) were subjected to Western Blotting (A) and MTT assay (B) at different time points. The dots represent the means, and the bars indicate the SD.  $*p < 0.05$  using the independent Student t test ( $n=3$ ). The results are expressed as the mean  $\pm$  SD of three independent experiments. (E) The *in vivo* growth of the indicated stable cell lines was examined as described in the Materials and Methods. The images and weight of xenograft tumors are shown in the left and right side, respectively. The dots represent the weights, and the bars indicate the SD.  $*p < 0.05$  using the independent Student t test ( $n=6$ ).

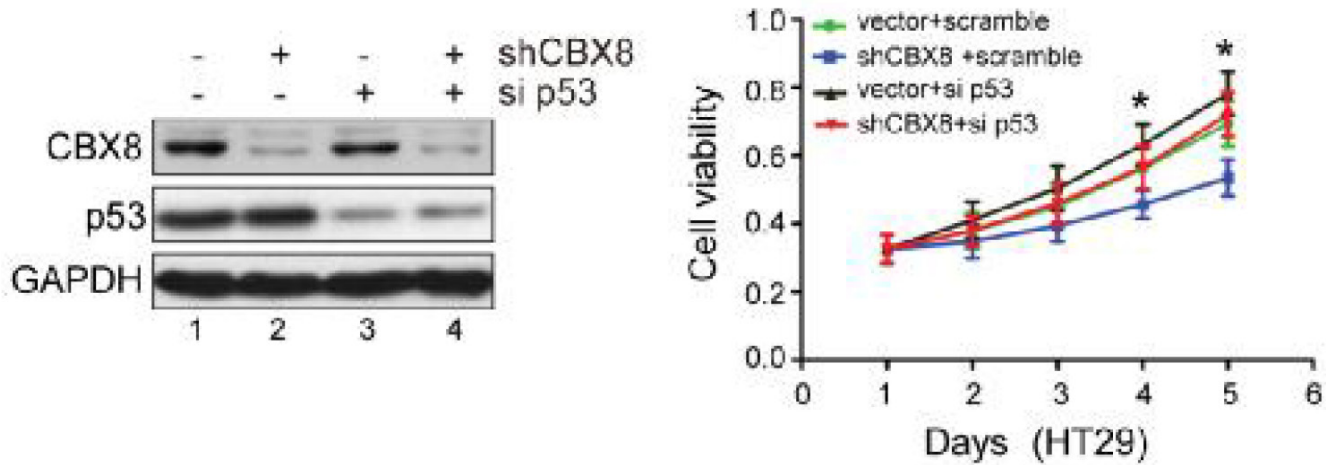

**Supplementary Figure S3: The cell proliferation inhibition after CBX8 knockdown was mostly dependent on p53 in HT29 cells.** HT29 cells were treated as indicated, proteins were analyzed (left panel) and cell viability was measured by MTT (right panel). The dots represent the means, and the bars indicate the SD. \* $p < 0.05$  using the independent Student t test (n=3).

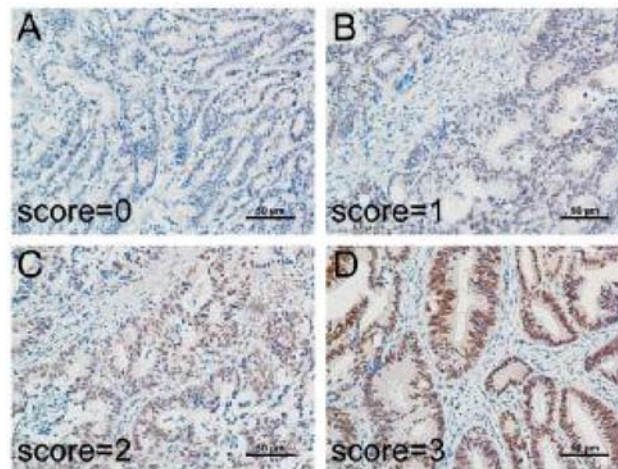

**Supplementary Figure S4: IHC grading intensity for CBX8.** (A, B, C, D) Representative immunohistochemically stained images of CBX8 in CRC. The intensity of the CBX8 signal in CRC was scored as four grades (0, 1, 2, 3), representing negative CBX8 staining (A), weak CBX8 staining (B), moderate CBX8 staining (C), and strong CBX8 staining (D), respectively. Image magnification is 200 $\times$ .



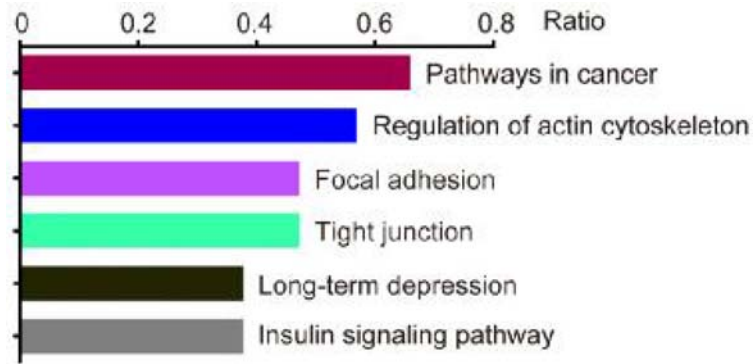

**Supplementary Figure S5: Altered pathways in CBX8-knockdown CRC cells.** Gene expression profiles were produced in both sh-Control and sh-CBX8 stable transfectants in HT29 and HCT116 cells, and only mRNA levels that changed more than 2-fold were analyzed by KEGG Pathway analysis.

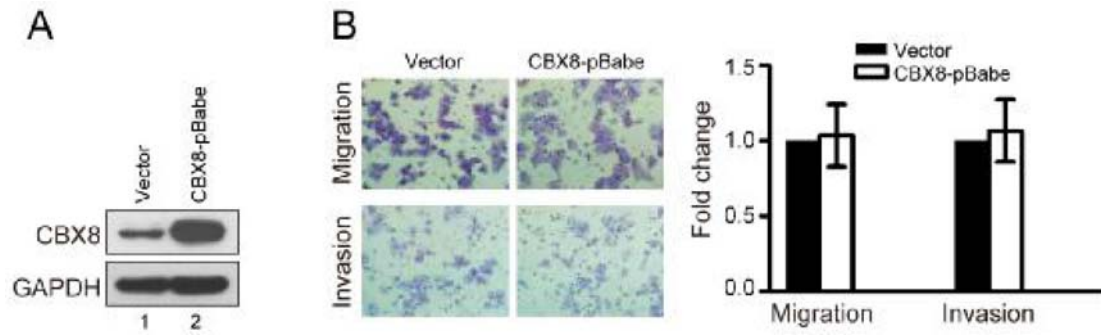

**Supplementary Figure S6: Ectopic CBX8 did not change CRC cell motility.** HCT116 cells stably vector or overexpressing CBX8 as indicated were subjected to Western blotting (A), and to cell migration and invasion assay (B) as described in the Materials and Methods (n=3). The results are expressed as the mean  $\pm$  SD of three independent experiments.

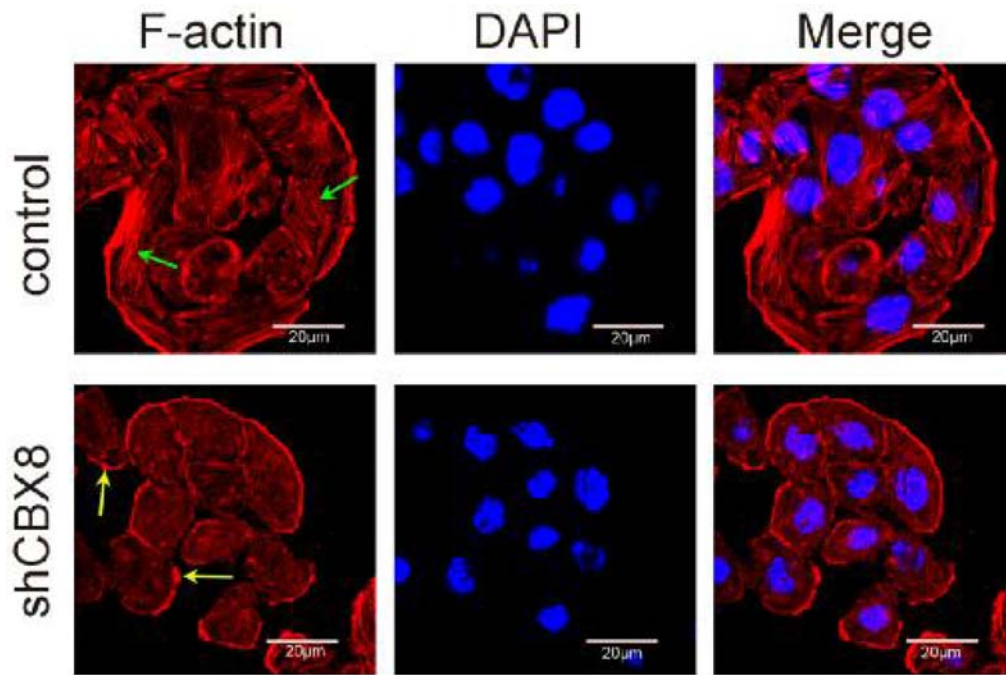

**Supplementary Figure S7: The knockdown of CBX8 induced the rearrangement of the actin cytoskeleton.** The sh-Control and sh-CBX8 stable HT29 cell transfectants were stained with rhodamine-conjugated phalloidin (a marker of F-actin, red) and DAPI (blue). Scale bars, 20 μm for phase-contrast (green arrow, bundles of actin filaments and yellow arrow, protrusion of cortical actin).

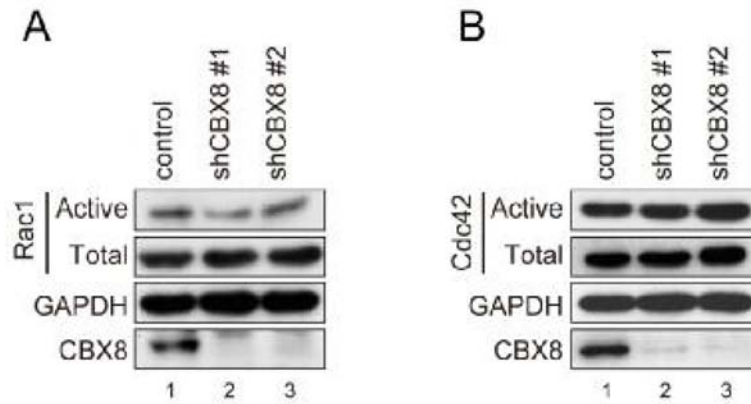

**Supplementary Figure S8: The knockdown of CBX8 did not affect the activity of Rac 1 nor Cdc42.** (A, B) Western blotting was performed after a pull-down of the activated forms of Rac1 and Cdc42 in HCT116 cells, respectively, as described in the Materials and Methods section.

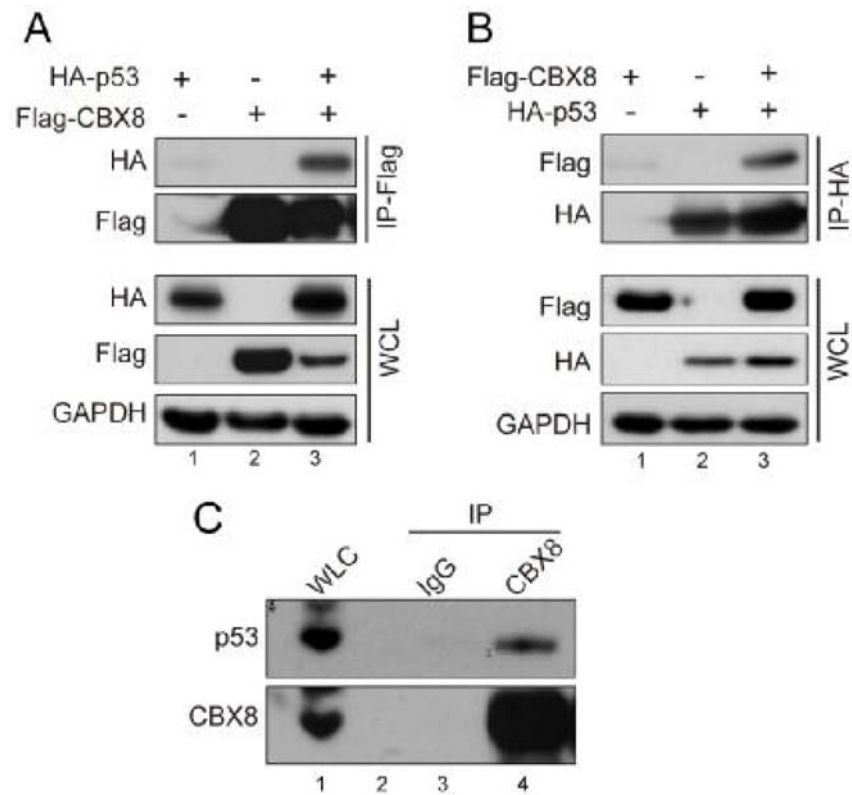

**Supplementary Figure S9: CBX8 interacted with p53.** (A, B) HEK293T cells were transfected with the indicated plasmids for 24 hours and then were lysed with MCLB. IP was performed using anti-Flag antibodies (A) or anti-HA antibodies (B) and then subjected to Western Blot. (C) HCT116 cells were lysed with MCLB. IP was performed using an anti-CBX8 antibody followed by Western Blotting. WCL, whole cell lysate and IP, immunoprecipitation.

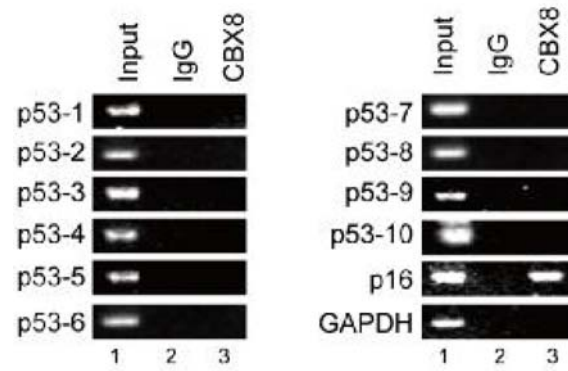

**Supplementary Figure S10: CBX8 was undetectable in the p53 promoter region.** ChIP assay was performed with HCT116 cells using an anti-CBX8 antibody or IgG antibody as indicated. Ten pairs of primers targeting the p53 promoter and surrounding region were used. The p16 and GAPDH promoters were used as the positive and negative controls, respectively.
